# Supplementary material
Source: PubMed Central journal article supplement (PMC7783775)
Supplement: ajcr0010-4527-f5.pdf [file ajcr0010-4527-f5.pdf]

A prognostic model for FLT3-ITD-positive AML

**Supplementary Table 1.** 185 gene panel

|             |         |          |              |              |           |
|-------------|---------|----------|--------------|--------------|-----------|
| ABL1        | ASXL1   | ATM      | BCOR         | BIRC3        | BLM       |
| BRAF        | BTK     | CALR     | CBL          | CDKN2A       | CEBPA     |
| CSF3R       | DDX41   | DKC1     | DNMT3A       | ELANE (ELA2) | EP300     |
| ETNK1       | ETV6    | EZH2     | FBXW7        | FLT3         | GATA1     |
| GATA2       | GATA3   | GFI1     | HAX1         | IDH1         | IDH2      |
| IKZF1       | IL7R    | JAK1     | JAK2         | JAK3         | KIT       |
| KMT2A (MLL) | KRAS    | MPL      | MYD88        | NF1          | NOTCH1    |
| NPM1        | NRAS    | PHF6     | PIGA         | PLCG2        | PRPF8     |
| PTPN11      | RB1     | RUNX1    | SETBP1       | SF3B1        | SH2B3     |
| SRP72       | SRSF2   | STAG2    | STAT3        | TERC         | TERT      |
| TET2        | TP53    | TPMT     | U2AF1        | WT1          | ZRSR2     |
| ABCB1       | ABCG2   | ADSL     | ALK          | ANKRD26      | ARID1B    |
| ASNS        | ASXL2   | ATRX     | B2M          | BCL11B       | BCL2      |
| BCL6        | BCORL1  | BMP7     | CACNA1G      | CCDC168      | CCND3     |
| CD79A       | CDA     | CDKN1B   | CECR2        | CEP72        | CPA2      |
| CREBBP      | CRLF2   | CTCF     | CTLA4        | CTNNB1       | CUX1      |
| CYP2B6      | CYP2C19 | CYP2C8   | CYP3A4       | CYP3A5       | CYPA      |
| DARS        | DHX15   | DHX30    | DIS3         | DNAH2        | DNM2      |
| DOK5        | DORSHA  | DYNC2H   | EPOR         | ERCC1        | FAM46C    |
| FAT1        | FCGR3A  | FOXO1    | GART         | GNAS         | GRIA1     |
| GSTM1       | GSTP1   | HLA-DRB1 | ID3          | IMPDH2       | ITPA      |
| KDM5C       | KDM6A   | KDM6B    | KMT2C        | KMT2D (MLL2) | LINC00251 |
| MACF1       | MAP2K1  | MED12    | MSH6         | MTHFR        | MTRR      |
| MYC         | NFATC2  | NR3C1    | NSD2 (WHSC1) | NT5C2        | NUDT15    |
| NUMB        | PAX5    | PCLO     | PDGFRA       | PDGFRB       | PIK3R1    |
| PNPLA3      | PPM1D   | PRKDC    | PRPS1        | PTEN         | RAD21     |
| RPL10       | RRM1    | RRM2     | RRM2B        | SERPINE1     | SETD2     |
| SLC22A1     | SLC01A2 | SLC01B1  | SMC1A        | SMC3         | SOD2      |
| SOS1        | SPI1    | SRCAP    | SRGAP1       | SRGAP2       | SRGAP3    |
| STAT5B      | TNF     | TNFAIP3  | TNFRSF14     | TRIM24       | UGT1A1    |
| UGT1A8      | USH2A   | USP7     | VEGFC        | XRCC5        |           |

# A prognostic model for FLT3-ITD-positive AML

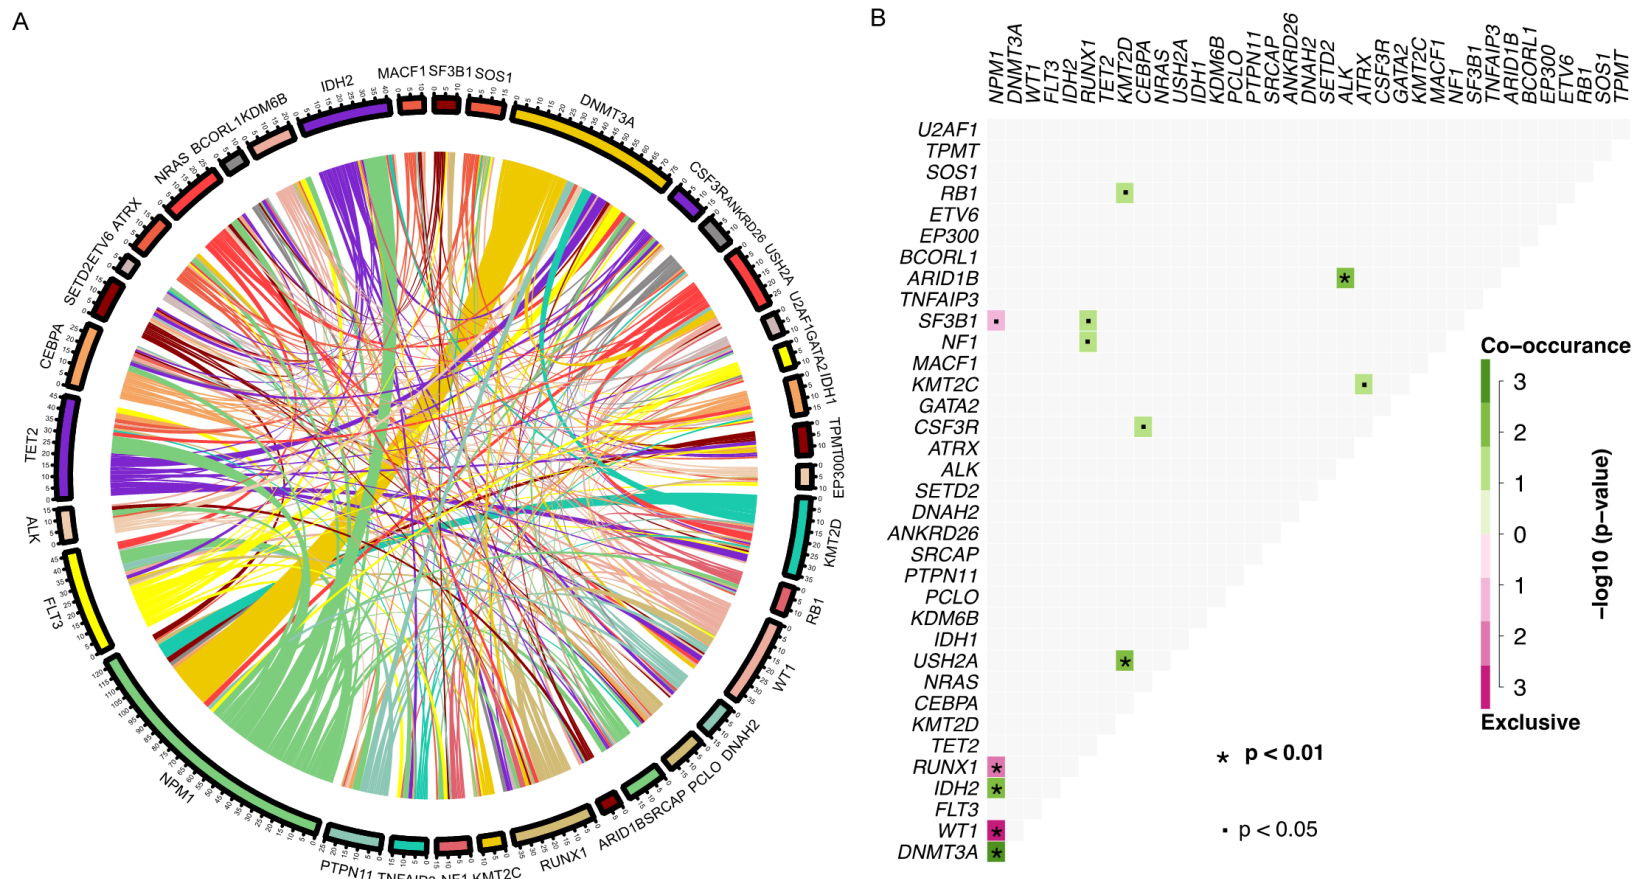

Supplementary Figure 1. Circos diagram and gene association diagram in 81 patients.

## A prognostic model for FLT3-ITD-positive AML

**Supplementary Table 2.** Cox univariate analysis for overall survival in 81 patients

| Factor                                 | HR   | Low 95% | Up 95% | P value |
|----------------------------------------|------|---------|--------|---------|
| AGE (44 years)                         | 2.51 | 1.45    | 4.32   | 0.002   |
| SEX                                    | 0.60 | 0.35    | 1.03   | 0.063   |
| WBC (median 60.4 * 10 <sup>9</sup> /L) | 1.28 | 0.74    | 2.21   | 0.366   |
| HB (median 85 g/l)                     | 0.92 | 0.54    | 1.59   | 0.768   |
| PLT (median 46 * 10 <sup>9</sup> /L)   | 0.83 | 0.48    | 1.43   | 0.502   |
| LDH (median 886 U/L)                   | 1.15 | 0.66    | 2.02   | 0.621   |
| BM BLAST (median 78%)                  | 1.20 | 0.70    | 2.08   | 0.499   |
| FLT3_ITD_VAF (0.48%)                   | 2.12 | 1.05    | 4.26   | 0.009   |
| FLT3_ITD_num (1 or more than 1)        | 2.23 | 0.96    | 5.16   | 0.011   |
| Length (69 bp)                         | 1.58 | 0.79    | 3.16   | 0.140   |
| Location (JM/beta1-sheet/other)        | 1.13 | 0.51    | 2.54   | 0.773   |
| DNMT3A                                 | 2.39 | 1.26    | 4.53   | 0.001   |
| ALK                                    | 3.57 | 0.43    | 29.42  | 0.020   |
| CSF3R                                  | 0.00 | 0.00    | 0.00   | 0.035   |
| U2AF1                                  | 3.98 | 0.26    | 61.40  | 0.036   |
| SRCAP                                  | 2.14 | 0.67    | 6.89   | 0.071   |
| SETD2                                  | 0.20 | 0.08    | 0.51   | 0.071   |
| USH2A                                  | 1.83 | 0.67    | 5.03   | 0.128   |
| SF3B1                                  | 0.24 | 0.09    | 0.69   | 0.128   |
| NRAS                                   | 0.42 | 0.19    | 0.96   | 0.135   |
| MACF1                                  | 0.25 | 0.09    | 0.71   | 0.136   |
| ARID1B                                 | 1.85 | 0.56    | 6.13   | 0.181   |
| FLT3                                   | 1.57 | 0.70    | 3.51   | 0.193   |
| ECOG                                   | 1.42 | 0.76    | 2.65   | 0.199   |
| TET2                                   | 1.52 | 0.66    | 3.50   | 0.247   |
| IDH2                                   | 0.63 | 0.32    | 1.25   | 0.255   |
| BCORL1                                 | 0.34 | 0.10    | 1.15   | 0.267   |
| RUNX1                                  | 0.64 | 0.31    | 1.31   | 0.291   |
| NPM1                                   | 1.33 | 0.77    | 2.29   | 0.307   |
| CEBPA                                  | 0.60 | 0.26    | 1.39   | 0.325   |
| ATRX                                   | 0.54 | 0.19    | 1.60   | 0.390   |
| NF1                                    | 0.56 | 0.19    | 1.67   | 0.416   |
| TNFAIP3                                | 1.57 | 0.38    | 6.55   | 0.445   |
| GATA2                                  | 1.46 | 0.37    | 5.81   | 0.522   |
| PCLO                                   | 0.78 | 0.31    | 1.95   | 0.627   |
| KMT2D                                  | 1.19 | 0.51    | 2.79   | 0.663   |
| PTPN11                                 | 1.22 | 0.40    | 3.73   | 0.694   |
| CCDC168                                | 0.89 | 0.39    | 2.01   | 0.789   |
| IDH1                                   | 0.88 | 0.33    | 2.30   | 0.799   |
| ANKRD26                                | 0.89 | 0.29    | 2.67   | 0.837   |
| KDM6B                                  | 1.12 | 0.33    | 3.82   | 0.848   |
| DNAH2                                  | 0.90 | 0.30    | 2.72   | 0.854   |
| TPMT                                   | 1.12 | 0.25    | 4.99   | 0.871   |
| EP300                                  | 0.91 | 0.23    | 3.51   | 0.893   |
| WT1                                    | 0.96 | 0.48    | 1.89   | 0.898   |
| PCLO                                   | 1.06 | 0.37    | 3.02   | 0.910   |
| KMT2C                                  | 0.97 | 0.31    | 3.08   | 0.965   |

## A prognostic model for FLT3-ITD-positive AML

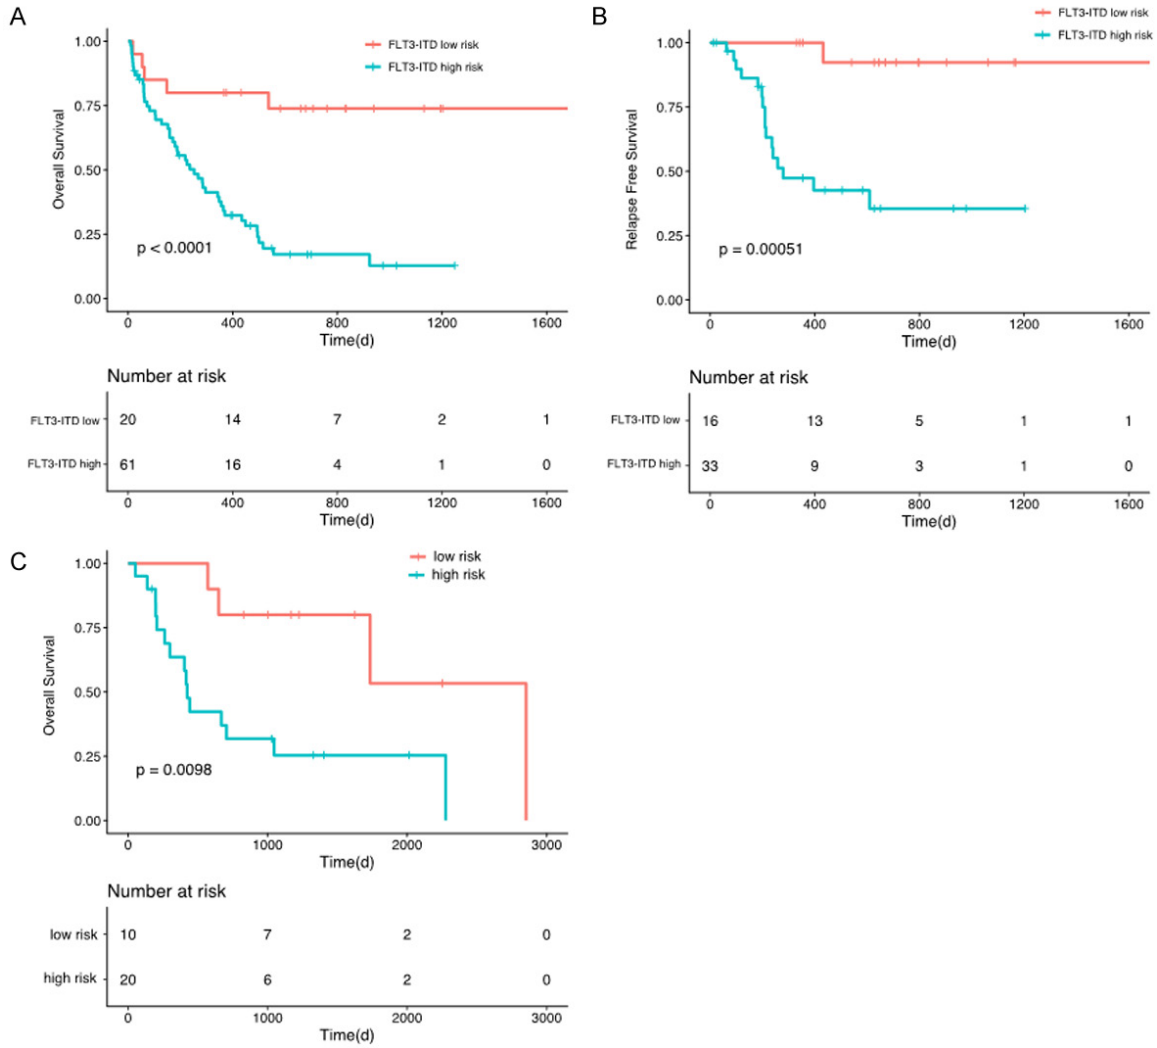

**Supplementary Figure 2.** OS and RFS in different risk groups according to the novel scoring model. A. OS in the experimental cohort. B. RFS in the experimental cohort. C. OS in validation cohort.

### A prognostic model for FLT3-ITD-positive AML

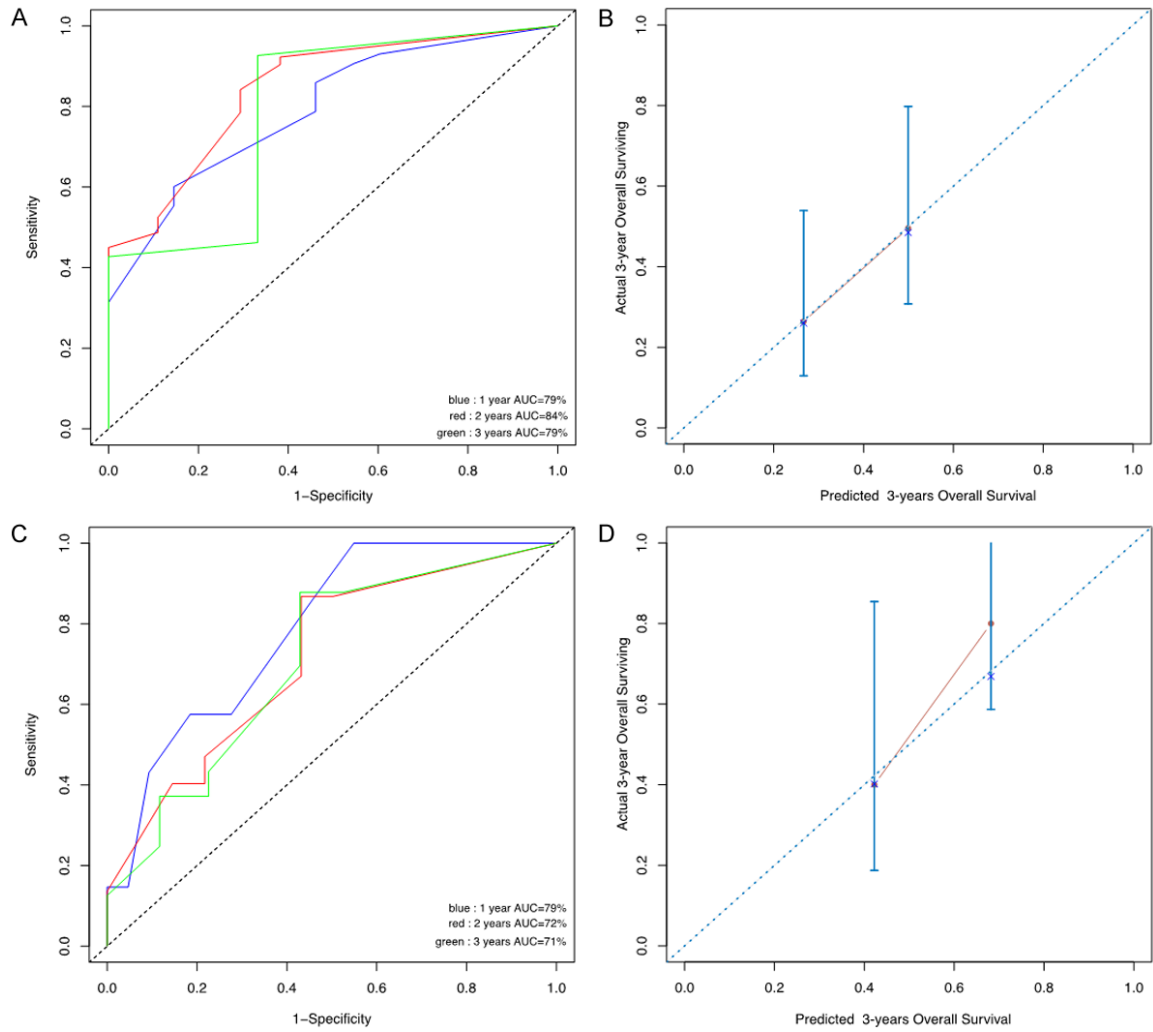

**Supplementary Figure 3.** Discrimination ability with the use of the receiver operating characteristic curve in experimental cohort (A) and validation cohort (C). Calibration curves for predicting patient overall survival at 3 years in experimental cohort (B) and validation cohort (D).
